# Supplementary material
Source: publisher site journal article supplement (https://www.degruyterbrill.com/publication/isbn/9783839404973/downloadAsset/9783839404973_Leseprobe.pdf)
Supplement: Supplementary file 1 [file 9783839404973_Leseprobe.pdf]

## Kapitel 1

### Einleitung

---

„The global city is both the venue and the product of our own struggles to become what we would like to be, and in the end there is no alternative but to take responsibility for what we have created.“ (Magnusson 2000: 304)

Nicht erst seit der Diskussion um Global Cities wird uns die Vielfalt und Komplexität der Stadt und ihre Bedeutung für das Zusammenleben ihrer Bewohner bewusst. Seit den Anfängen der Stadtforschung wird über den Wandel der Städte diskutiert und über ihre jeweilige Bedeutung für gesellschaftliche Zusammenhänge nachgedacht. Allerdings haben die stadtgeographischen Analysen im Laufe der Zeit einen deutlichen Perspektivwechsel erfahren, der von anfänglichen Beschreibungen der Morphologie über die Darstellung der sozio-ökonomischen Strukturen bis zu Untersuchungen sozialgeographischer Gruppen und schließlich Individuen reicht. Die Global City-Forschung hat diesen Studien eine neue Maßstabsebene hinzugefügt und Städte über den regionalen oder nationalen Kontext hinaus hinsichtlich ihrer Einbindung in weltweite Verflechtungen und Netzwerke untersucht. Dadurch wurden Städte nicht mehr als geschlossene Entitäten angesehen, sondern als ein Bestandteil weltweiter Verflechtungen und Ströme, die im ständigen Wandel begriffen sind und in Abhängigkeit von gesellschaftlichen, ökonomischen und politischen Entwicklungen betrachtet werden müssen.

Weiterhin hat die allgemeine Euphorie über Global Cities aber auch dazu geführt, dass eine Vielzahl von Studien, die sich mit der Untersuchung von Städten auf unterschiedliche Art und Weise befassen, dies nun unter dem Schlagwort der Globalisierung tun, ohne dass sie einen gemeinsamen theoretischen Überbau hätten. Global Cities sind zu einem Sammelbegriff geworden, unter dem sich Städte nach Soja (2000) „bürs-

tenartig“ zusammenkehren lassen, unabhängig davon, welchen theoretischen Ansatz die Untersuchungen verfolgen. In der Fachöffentlichkeit besonders eingeschlagen haben die zahlreichen Veröffentlichungen der *Global and World City Research Group* (GaWC) aus Loughborough um Taylor, Beaverstock, Smith et al., die neben dem Theorie- auch ein Empiriedefizit der Weltstadtforschung konstatiert haben und zumindest letzteres durch eine aufwändige, statistische Methode zur Aufstellung eines weltweiten Netzwerk globaler Städte behoben haben (vgl. Beaverstock et al. 1999). Dies hat dazu geführt, dass nicht nur ein weltweites Raster von Städten aufgestellt wurde, sondern auch ein globales Netzwerk von Global City-Forschern entstanden ist, in dem auf dem gesamten Erdball diese Methode angewendet, kritisiert oder weiterentwickelt werden kann (vgl. <http://www.lboro.ac.uk>).

Doch welcher Theorie lässt sich der Global City-Ansatz zuordnen, der von Friedman als ein heuristisches Konzept aufgestellt (Friedmann/Wolff 1982, Friedmann 1986) und insbesondere von Sassen weiterentwickelt wurde (Sassen 1991/2001) und längst nicht mehr mit den Modellen der klassischen Chicagoer Schule zu fassen ist? Dear (2002) deutet in seinem Buch *From Chicago to L.A. Making Sense of Urban Theory* auf recht provokante Weise an, dass das Zeitalter der klassischen Schule der Stadttheorie, die durch die Modelle der Chicagoer Schule ausgedrückt wurde, durch einen neuen Prototyp der Stadtentwicklung nach dem Vorbild von Los Angeles abgelöst worden sei. Er diskutiert hier den Typus einer postmodernen Stadt, hervorgerufen durch einen sogenannten postmodernen Urbanismus, der sich deutlich von den Strukturen Chicagos abhebt und neue Stadtentwicklungsmuster entstehen lässt. Wood (2003) spricht in diesem Zusammenhang von zwei Theoriesträngen, die zu berücksichtigen seien; er nennt neben der regulationstheoretischen Schule den Global City-Ansatz, der zu einer neuen Perspektive und Untersuchung von Städten geführt habe. Allerdings übt Smith (2003a, 2003b) eine grundlegende Kritik an der gesamten Global City-Forschung und verschont dabei weder Castells, Sassen noch Massey. Während er den intrinsischen Ansätzen wie der Chicagoer Schule vorwirft, Städte lediglich auf ihre „Innereien“ zu reduzieren, ohne ihre Einbindung in regionale oder überregionale Verflechtungen zu beachten, würden die Global City-Forscher mit ihrer extrinsischen Perspektive sämtliche Stadtentwicklungsprozesse auf äußere sozio-ökonomische Gesetze zurückführen, ohne die Städte selbst als entscheidende Prozessräume zu sehen. Smith schlägt daher eine Erweiterung des Ansatzes um eine poststrukturalistische Perspektive und die Aspekte der Actor-Network-Theorie vor, nach der keine Unterscheidung zwischen Prozessen und Dingen, zwischen Lebewesen und Nicht-Lebewesen gemacht

wird, sondern Städte als eine Oberfläche von Praktiken und Beziehungen, von Aktivitäten und Interaktionen gesehen werden, die es zu untersuchen gilt. Städte sind demnach agierende Kräfte, die das Netzwerk, in das sie eingebunden sind, verändern und beeinflussen können.

In eine ähnliche Richtung weist die vorliegende Untersuchung. Am Beispiel der Stadt Washington wird vorgeführt, dass der städtische Kontext entscheidend für die Ausbildung von Beziehungen und Handlungsströmen ist und somit auch transnational bedeutsame Aktivitäten durch den speziellen lokalen Kontext geprägt werden. Die Stadt wird zu einem Akteur, der Beziehungen verändern kann und aktiv in die Ausbildung von Prozessen eingreift.

Außerdem wird ein zweiter, wesentlicher Kritikpunkt an der Weltstadtforschung aufgegriffen. Zahlreiche Untersuchungen bemängeln die Einseitigkeit der Weltstadtforschung und die Reduktion der Städte auf ihre Bedeutung als Kommandoposten einer global vernetzten Weltwirtschaft, weil dadurch viele bedeutsame Städte sowie die in ihnen ablaufenden Prozesse nicht weiter berücksichtigt werden (z.B. Robinson 2002). Dadurch kommt es zu einer Überbetonung einzelner Standorte, die sich selbst verstärken und andere Städte in das Abseits stadtgeographischer Untersuchungen drängen. Andere Aspekte der Globalisierung, wie zum Beispiel soziale oder politische Faktoren, werden dagegen bei der Ausbildung von Global Cities vernachlässigt. Dies steht in einem starken Widerspruch zur allgemeinen Diskussion um Globalisierung, bei der gerade der Bedeutungszuwachs zivilgesellschaftlicher politischer Akteure immer wieder als eine der wichtigsten Veränderungen der letzten Jahre konstatiert wird (z.B. Taylor et al. 2002, Salamon et al. 1999b, Friedrich-Ebert-Stiftung 1996). Untersuchungen zu NGOs laufen sich nahezu den Rang ab (z.B. Heins 2002b, Frantz 2002), wobei häufig auch von dem Entstehen einer globalen Zivilgesellschaft gesprochen wird, die sich deutlich von den sozialen Bewegungen der früheren Dekaden unterscheiden würde (Keane 2003, Kaldor 2003). Dabei wird jedoch selten ein inhaltlicher Zusammenhang zur Globalisierung von Städten hergestellt. Zwar bilden Städte, insbesondere globale Städte, die Orte, in denen sich die transnationalen Aktivitäten bündeln und Entscheidungen ausgetragen werden, dennoch scheint sich die Globalisierungsdiskussion in einem „ortslosen“ Raum zu bewegen, in einem „Raum der Ströme“ nach Castells (1996), der sich nicht durch Längen- und Breitengrade genau fixieren lasse. Im Sinne des Verständnisses von Städten als aktiven Gebilden, die Beziehungen beeinflussen und Rahmenbedingungen schaffen, sowie im Kontext der Diskussion um Städte als Knotenpunkte in einem globalen Netzwerk wird daher ein Zusammenhang zwischen der Ausbildung einer transnationalen Zivilgesellschaft und der Forma-

tion von Weltstadtfunktionen hergestellt. Global Cities werden als die Mikrostandorte der Zivilgesellschaft angesehen, in denen sich spezifische Beziehungsmuster von politischen Akteuren ausbilden, die die Weltzivilgesellschaft und die Weltstädte auf besondere Art beeinflussen.

Die zentrale These der vorliegenden Untersuchung ist somit, dass die Global City-Forschung zu kurz greift, wenn sie Städte der Welt lediglich in einem quantitativen Ranking zu ordnen versucht und dabei ausschließlich ökonomische Indikatoren verwendet. Politische Akteure wie zum Beispiel *Amnesty International* agieren ebenso transnational wie die großen Ölkonzerne *BP* und *Exxon*. Sie beeinflussen das weltweite Netzwerk von Städten und Beziehungen ebenso wie die *global players* der Weltwirtschaft, auch wenn von ihnen eine andere Macht als nur ökonomische Stärke ausgeht. Sie nutzen die Synergieeffekte von Agglomerationen auf ähnliche Weise, wie dies für wirtschaftliche Akteure nachgewiesen wurde (Scott 2001b). Daher wird im Folgenden untersucht, wie Städte zum einen durch politische Akteure geprägt und hinsichtlich ihrer Bedeutung als Global Cities beeinflusst werden, zum anderen wie diese Städte gesellschaftliche und politische Beziehungen beeinflussen und formen.

Empirisches Anwendungsbeispiel ist die Stadt Washington, D.C.; eine Metropole also, die in geographischen Untersuchungen neben ihrer Funktion als Hauptstadt nur wenig Berücksichtigung findet und gerade in der Weltstadtforschung im Vergleich zu New York, London, Tokio oder Los Angeles ein Schattendasein führt. Dies geschieht völlig unberechtigter Weise, denn auch hier spielen sich stadtgeographische Prozesse ab, die ihrer Bedeutung und ihrem Umfang nach mit denen in anderen „Metropolen des Weltmarkts“ (Sassen) konkurrieren können. Führt man also Michael Dears (2002) Idee einer theoretischen Reise von Chicago nach L.A. fort, gelangt man durchaus nach Washington, D.C. Diese Stadt soll zwar nicht als neuer Prototyp eines Stadtmodells verstanden werden, sie bildet aber eine sinnvolle Ergänzung der Weltstadtdiskussion: Die „globale urbane Analyse“ (Taylor 2004a) wird um den Aspekt der politischen Akteure erweitert, die im Zeichen von Globalisierung eine neue Bedeutungsdimension erhalten haben.

Ziel der vorliegenden Untersuchung ist es, den metropolitanen Wandel der Städte westlicher Gesellschaften innerhalb der letzten Dekaden nicht nur im Zeichen von ökonomischen Entwicklungen des sogenannten postfordistischen Zeitalters zu betrachten, sondern ihn im Zusammenhang mit einer im zunehmenden Maße einflussreichen Zivilgesellschaft zu analysieren. Global Cities sind mitnichten ausschließlich Kommandozentralen transnationaler Wirtschaftsunternehmen im Bereich hochspezialisierter Dienstleistungen, sondern sie sind Schauplatz

und Austragungsort transnationaler politischer Prozesse. Damit liegt die Untersuchung an der Schnittstelle zwischen Stadtgeographie und Politischer Geographie, indem sie versucht, die beiden theoretischen Konstrukte von Global Cities und globaler Zivilgesellschaft in einem Untersuchungsvorhaben zu integrieren sowie wechselseitige Abhängigkeiten und Parallelen herauszustellen. Der Schwerpunkt liegt hierbei auf dem stadtgeographischen Ansatz, um Städte nicht nur als neutralen Raum von außen zu betrachten, sondern als Prozess und Mediator gesellschaftlicher Zusammenhänge.

Im Folgenden wird eine politische Stadtgeographie Washingtons geschrieben, in der theoretische Überlegungen zum Einfluss der Zivilgesellschaft auf den metropolitanen Wandel in die allgemeine Global City-Diskussion eingebunden und diese auf den Raum übertragen werden. Damit wird ein Beitrag zur Global City-Forschung geleistet, der von dem indikatoriellen Ranking global bedeutsamer Städte wegführt und Städte auf ihre lokale Ebene herunterführt. Indem im Rahmen der Global City-Diskussion auf Einzelfälle, nämlich die Stadt Washington und die in ihr lebenden und handelnden Akteure geschaut wird, kann der viel beschworene global-lokale Nexus mit Inhalten gefüllt und die Analyse auf eine verstehende, lebensweltliche Ebene geführt werden.

Die Arbeit gliedert sich in einen theoretischen Teil, in dem die beiden Forschungsgegenstände Global City und transnationale Zivilgesellschaft im Kontext der geographischen Forschung zunächst getrennt vorgestellt und analysiert werden (Kapitel 2), um dann eine Brücke zur Verbindung dieser beiden Theoreme zu schlagen und damit das Forschungsdesign der vorliegenden Untersuchungen und die methodologische Umsetzung der Fragestellung zu erläutern (Kapitel 3). Der empirische Teil diskutiert Washington zuerst im Kontext einer erweiterten Global City-Forschung, um die besonderen Wachstumsprozesse der *restless urban landscape* Washingtons zu dokumentieren (Kapitel 4). Dabei werden auch einzelne Stadtentwicklungsprozesse, die im engen Zusammenhang mit der besonderen Entwicklung einer politischen Weltstadt stehen, exemplarisch in Form stadtgeographischer Exkurse diskutiert. Anschließend steht die genaue Analyse des politischen Sektors in Washington, D.C., im Mittelpunkt (Kapitel 5). Hierzu werden die verschiedenen Sphären des politischen Sektors vorgestellt und die Ergebnisse der empirischen Untersuchung interpretiert. Eine genauere qualitative Analyse erfolgt anhand ausgewählter Akteure aus dem Bereich der transnationalen Bewegungsorganisationen. Sie haben den politischen Nährboden der Global City Washington auf besondere Art und Weise genutzt und gleichzeitig auch geprägt. Daher lassen sich bestimmte Handlungsstränge transnationaler politischer Akteure im lokalen Kon-

text Washingtons ableiten. Somit ist die These zulässig, dass Global Cities zu Mikrostandorten der globalen Zivilgesellschaft geworden sind. Dies wird in Kapitel 6 noch einmal abschließend diskutiert.
